# Supplementary material for: Validierung der deutschen Übersetzung des Childbirth Experience Questionnaire (CEQ2)
Source: Atypon-hosted journal article supplement (doi:10.1026/0012-1924/a000267), 2021-04-01
Supplement: 0012-1924_a000267_esm1.pdf [file 0012-1924_a000267_esm1.pdf]

## Elektronisches Supplement 1.

### *Vorgehen bei der Übersetzung des CEQ2 nach Beaton et al. (2000)*

Der CEQ2 wurde, wie von Beaton und Kollegen (2000) empfohlen, von drei bilingualen Experten unabhängig voneinander ins Deutsche übersetzt, wobei alle drei Experten bei der Übersetzung das Auftreten von vier vordefinierten Äquivalenzproblemen (semantisch, idiomatisch, empirisch, konzeptuell) für jedes Item getrennt protokollierten. Im Anschluss daran wurde in einer Experten-Konferenz bestehend aus den drei bilingualen Sprachexperten, einer Methodenexpertin sowie einer Expertin für Geburtshilfe im Rahmen einer ersten Synthese aus den drei Übersetzungsversionen unter Berücksichtigung der kritischen Itemanmerkungen eine erste deutsche Version des Fragebogens erstellt. Bei drei Items (Items 20, 21 und 22) fiel im Rahmen der Übersetzung auf, dass wahrscheinlich als Folge der Übersetzung der schwedischen Originalversion ins Englische unklar war, ob diese Items sich – wie intendiert – auf die Geburt eines Kindes oder auf die eigene Geburt beziehen; in der Deutschen Version erfolgte daher entsprechend des Expertenkonsens und nach Rücksprache mit der Entwicklerin des Instruments eine klare Bezugnahme auf die Geburt eines Kindes. Die Rückübersetzung dieser Version ins Englische erfolgte erneut von zwei unabhängigen bilingualen Experten, denen die Originalversion des Fragebogens nicht bekannt war. Auch in dieser Übersetzungsphase erfolgte eine itemweise Protokollierung möglicher Äquivalenzprobleme; anschließend wurde in einer erneuten Experten-Konferenz (zwei Rückübersetzer, eine Sprachexpertin, eine Methodenexpertin, eine Expertin für Geburtshilfe) unter Berücksichtigung aller Berichte im Rahmen einer Synthese eine englische Rückübersetzung erstellt. Beim Vergleich der englischen Originalversion und mit dieser Rückübersetzung wurden bei zwei Items kleine Abweichungen festgestellt (Item 14 und 22), sodass diese Items in der vorläufigen Deutschen Version des CEQ2 angepasst wurden. Zur Überprüfung der Itemverständlichkeit dieser vorläufigen deutschsprachigen Version des CEQ2 erfolgte eine Pre-Testung mit 20 Frauen. Da die befragten Frauen keine Verständnisprobleme berichteten, wurde diese Version des CEQ2 unverändert in der folgenden Validierungsstudie eingesetzt.

*Anmerkungen:* CEQ2 = Childbirth Experience Questionnaire.
