# Supplementary material for: Validierung der deutschen Übersetzung des Childbirth Experience Questionnaire (CEQ2)
Source: Atypon-hosted journal article supplement (doi:10.1026/0012-1924/a000267), 2021-04-01
Supplement: 0012-1924_a000267_esm3.pdf [file 0012-1924_a000267_esm3.pdf]

## Elektronisches Supplement 3.

Deskriptive Kennwerte sowie unstandardisierte Faktorladungen der explorativen Faktorenanalyse<sup>1</sup> der Einzelitems des CEQ2 (N = 295)

| Item-Nr.  | Itemformulierung                                                                            | M    | SD  | Item-schwierigkeit | Trennschärfe <sup>2</sup> | F1         | F2         | F3   | F4   |
|-----------|---------------------------------------------------------------------------------------------|------|-----|--------------------|---------------------------|------------|------------|------|------|
| <i>F1</i> | <i>Bewältigungsmöglichkeiten</i>                                                            |      |     |                    |                           |            |            |      |      |
| 2.        | Ich fühlte mich während der Wehen und der Entbindung stark.                                 | 2.53 | .79 | 63.22              | .61                       | <b>.71</b> | .02        | .03  | .03  |
| 3r.*      | Ich hatte während der Wehen und der Entbindung Angst.                                       | 2.62 | .99 | 65.42              | .41                       | <b>.57</b> | -.03       | -.22 | -.23 |
| 4.        | Ich hatte während der Wehen und der Entbindung Vertrauen in meine Fähigkeiten.              | 2.85 | .79 | 71.27              | .64                       | <b>.80</b> | .06        | -.19 | .01  |
| 7.        | Ich hatte das Gefühl, dass ich mit der Situation gut zurecht gekommen bin.                  | 2.82 | .80 | 70.34              | .68                       | <b>.73</b> | .05        | .01  | .11  |
| <i>F2</i> | <i>Professionelle Unterstützung</i>                                                         |      |     |                    |                           |            |            |      |      |
| 9r.*      | Ich wünschte, dass Personal hätte mir während der Wehen und der Entbindung besser zugehört. | 3.69 | .59 | 92.20              | .60                       | .01        | <b>.58</b> | .19  | -.03 |
| 13.       | Mein Partner und ich wurden beide mit Wärme und Respekt behandelt.                          | 3.79 | .44 | 94.66              | .60                       | -.08       | <b>.70</b> | .10  | -.02 |
| 14.*      | Ich erhielt die Informationen, die ich während der Wehen und der Entbindung benötigte.      | 3.71 | .57 | 92.71              | .55                       | .01        | <b>.62</b> | .01  | .02  |

|                         |                                                                                                              |      |      |       |     |      |            |            |      |
|-------------------------|--------------------------------------------------------------------------------------------------------------|------|------|-------|-----|------|------------|------------|------|
| 15r.                    | Ich hätte es besser gefunden, wenn die Hebamme während der Wehen und der Entbindung mehr dabei gewesen wäre. | 3.48 | .78  | 86.95 | .49 | -.02 | <b>.52</b> | .04        | -.01 |
| 16r.                    | Ich hätte mir von der Hebamme mehr Zuspruch gewünscht.                                                       | 3.73 | .56  | 93.14 | .64 | .03  | <b>.66</b> | -.03       | .04  |
| 17.                     | Die Hebamme strahlte eine Atmosphäre der Ruhe aus.                                                           | 3.79 | .50  | 94.83 | .58 | .03  | <b>.64</b> | .04        | -.04 |
| 18.                     | Die Hebamme hat mir geholfen meine innere Stärke zu finden.                                                  | 3.49 | .67  | 87.29 | .52 | .18  | <b>.48</b> | -.07       | .16  |
| 19.*                    | Mein Eindruck der medizinischen Fähigkeiten des Teams haben dazu beigetragen, dass ich mich sicher fühlte.   | 3.61 | .65  | 90.17 | .60 | .06  | <b>.66</b> | -.02       | .06  |
| <i>F3 Partizipation</i> |                                                                                                              |      |      |       |     |      |            |            |      |
| 10.*                    | Ich konnte so viel aufstehen und mich bewegen wie ich wollte.                                                | 3.19 | 1.04 | 79.66 | .46 | .05  | .07        | <b>.59</b> | -.02 |
| 11.*                    | Ich konnte auf die Art und Weise entbinden, wie ich wollte.                                                  | 3.20 | 9.64 | 80.00 | .52 | -.05 | .10        | <b>.57</b> | .16  |
| 12.                     | Ich konnte bezüglich meiner Betreuung und Behandlung, so viel ich wollte, mitentscheiden.                    | 3.37 | .76  | 84.15 | .50 | -.01 | <b>.40</b> | <b>.47</b> | .02  |

| <i>F4</i> | <i>Emotionales Erleben</i>                                                 |      |      |       |     |      |      |      |             |
|-----------|----------------------------------------------------------------------------|------|------|-------|-----|------|------|------|-------------|
| 6.*       | Ich fühlte mich während der Wehen und der Entbindung glücklich.            | 1.95 | .78  | 48.73 | .50 | .20  | -.22 | .06  | <b>.45</b>  |
| 20.       | Ich habe viele positive Erinnerungen an die Geburt.                        | 2.75 | .91  | 68.64 | .75 | -.02 | .03  | -.03 | <b>1.01</b> |
| 21r.      | Ich habe viele negative Erinnerungen an die Geburt.                        | 2.80 | .86  | 70.08 | .67 | .27  | .05  | .08  | <b>.54</b>  |
| 1.*       | Die Wehen und die Entbindung verliefen wie erwartet.                       | 2.39 | .82  | 59.83 | .40 | .18  | -.07 | .34  | .28         |
| 5r.*      | Ich war während der Wehen und der Entbindung erschöpft.                    | 1.80 | .86  | 44.92 | .41 | .33  | -.07 | .06  | .19         |
| 8r.       | Ich hätte eine andere Art der Schmerzbehandlung bevorzugt.                 | 3.19 | .93  | 79.83 | -   | .22  | -.01 | .26  | .14         |
| 22r.*     | Einige meiner Erinnerungen an die Geburt machen mich niedergeschlagen.     | 3.31 | .86  | 82.80 | -   | .16  | .17  | .19  | .22         |
| 23r.*     | Alles in Allem - wie schmerzhaft war die Geburt für Sie? VAS               | 1.81 | .88  | 45.34 | -   | -    | -    | -    | -           |
| 24.*      | Alles in Allem - wie viel Kontrolle hatten Sie während der Geburt? VAS     | 2.16 | 1.13 | 53.90 | -   | -    | -    | -    | -           |
| 25.*      | Alles in Allem - wie sicher haben Sie sich während der Geburt gefühlt? VAS | 3.10 | 1.07 | 77.54 | -   | -    | -    | -    | -           |

*Anmerkungen:* CEQ2 = revidierte Version des Childbirth Experience Questionnaire (Deutsche Version), *M* = Mittelwert, *SD* = Standardabweichung, *N* = Stichprobengröße, *r* = Item wegen gegenläufiger Polung invertiert (d.h. 1 = 4, 2 = 3, 3 = 2, 4 = 1), VAS = visuelle Analog-Skala;

<sup>1</sup> Extraktionsmethode = explorative Faktorenanalyse (EFA) mit Geomin-Rotation; Ausschluss von Item 23r, 24 und 25 wegen eines anderen Antwortformats; Relevante Ladungen  $\geq .40$  wurden fettgedruckt. <sup>2</sup> Die Trennschärfe wurde in Bezug auf die jeweilige Subskala des CEQ2 berechnet; \* Items wurden in der englischen Version des CEQ2 einem anderen Faktor zugeordnet (A. Dencker, persönl. Mitteilung, 26.11.2018).
