# Supplementary material for: Validierung der deutschen Übersetzung des Childbirth Experience Questionnaire (CEQ2)
Source: Atypon-hosted journal article supplement (doi:10.1026/0012-1924/a000267), 2021-04-01
Supplement: 0012-1924_a000267_esm4.pdf [file 0012-1924_a000267_esm4.pdf]

Elektronisches Supplement 4.

*Deskriptive Skalenskennwerte und Interkorrelationen der zur Validierung des CEQ2 betrachteten geburtsmedizinischen Variablen*

|     | <b>Skala</b>              | <b>N</b> | <b>M</b> | <b>SD</b> | <b>6</b> | <b>7</b> | <b>8</b> | <b>9</b> | <b>10</b> |
|-----|---------------------------|----------|----------|-----------|----------|----------|----------|----------|-----------|
| 6.  | Geburtsmodus <sup>1</sup> | 291      | .23      | .42       | 1.00     |          |          |          |           |
| 7.  | Geburtsdauer              | 208      | 7.09     | 4.41      | .26**    | 1.00     |          |          |           |
| 8.  | Oxytocingabe <sup>1</sup> | 290      | .42      | .50       | .13*     | .39**    | 1.00     |          |           |
| 9.  | Parität <sup>1</sup>      | 292      | .36      | .48       | -.24**   | -.38**   | -.17**   | 1.00     |           |
| 10. | PDA <sup>1</sup>          | 290      | .35      | .48       | .24**    | .50**    | .42**    | -.18**   | 1.00      |

*Anmerkungen:* CEQ2 = revidierte Version des Childbirth Experience Questionnaire (Deutsche Version), PDA = Periduralanästhesie; *N* = Stichprobengröße, *M* = Mittelwert, *SD* = Standardabweichung, 95%-VI = Bootstrap-95%-Vertrauensintervall. <sup>1</sup> Punktbiserialer Korrelation: Geburtsmodus: Spontanpartus (0) vs. operative Entbindung (1); Oxytocingabe: nein (0) vs. ja (1); Parität: Primipara (0) vs. Multipara (1); PDA: nein (0) vs. ja (1); \*  $p < .05$ , \*\*  $p < .01$  (Pearson-Korrelationskoeffizient, 2-seitig).
